# Supplementary material for: A Pilot Study on Plasma and Urine Neurotransmitter Levels in Children with Tic Disorders
Source: MDPI journal article supplement (doi:10.3390/brainsci12070880), 2022-07-04
Supplement: s1 [file s1]

**Table S1.** Sample size and detection rate of each neurotransmitter in plasma.

|                                               | 3–7-year-old | 8–12-year-old |
|-----------------------------------------------|--------------|---------------|
| Dopamine (DA)                                 | 31 (83.78%)  | 52 (91.23%)   |
| Epinephrine (E)                               | 35 (94.59%)  | 57 (100%)     |
| Norepinephrine (NE)                           | 37 (100%)    | 57 (100%)     |
| Metanephrine (MN)                             | 5 (13.51%)   | 7 (12.28%)    |
| Normetanephrine (NMN)                         | 32 (86.49%)  | 51 (89.47)    |
| 3-Methoxytyramine                             | 0 (0%)       | 0 (0%)        |
| 5-Hydroxytryptamine (5-HT)                    | 37 (100%)    | 57 (100%)     |
| Glutamic Acid (Glu)                           | 37 (100%)    | 57 (100%)     |
| Tyrosine (Tyr)                                | 37 (100%)    | 57 (100%)     |
| Tryptophan (Trp)                              | 37 (100%)    | 57 (100%)     |
| $\gamma$ -Aminobutyric acid ( $\gamma$ -GABA) | 35 (94.59%)  | 49 (85.96%)   |

**Table S2.** Sample size and detection rate of each neurotransmitter in urine.

|                                     | 3–7-year-old | 8–12-year-old |
|-------------------------------------|--------------|---------------|
| Dopamine (DA)                       | 24 (100%)    | 45 (100%)     |
| Epinephrine (E)                     | 24 (100%)    | 45 (100%)     |
| Norepinephrine (NE)                 | 24 (100%)    | 45 (100%)     |
| Metanephrine (MN)                   | 24 (100%)    | 45 (100%)     |
| Normetanephrine (NMN)               | 24 (100%)    | 45 (100%)     |
| Vanillylmandelic Acid (VMA)         | 24 (100%)    | 45 (100%)     |
| Homovanillic acid (HVA)             | 24 (100%)    | 45 (100%)     |
| 5-Hydroxyindoleacetic acid (5-HIAA) | 24 (100%)    | 45 (100%)     |

**Table S3.** AUC and significance of the ROC analysis for the prediction of an individual's status in plasma.

|                                               | 3–7-year-old |          | 8–12-year-old |          |
|-----------------------------------------------|--------------|----------|---------------|----------|
|                                               | AUC          | <i>P</i> | AUC           | <i>P</i> |
| Dopamine (DA)                                 | 0.515        | 0.844    | 0.688         | 0.001    |
| Epinephrine (E)                               | 0.499        | 0.991    | 0.475         | 0.650    |
| Norepinephrine (NE)                           | 0.642        | 0.035    | 0.654         | 0.005    |
| Normetanephrine (NMN)                         | 0.597        | 0.184    | 0.720         | 0.000    |
| 5-Hydroxytryptamine (5-HT)                    | 0.435        | 0.339    | 0.524         | 0.661    |
| Glutamic Acid (Glu)                           | 0.661        | 0.017    | 0.732         | 0.000    |
| Tyrosine (Tyr)                                | 0.552        | 0.440    | 0.405         | 0.080    |
| Tryptophan (Trp)                              | 0.528        | 0.677    | 0.258         | 0.000    |
| $\gamma$ -aminobutyric acid ( $\gamma$ -GABA) | 0.715        | 0.002    | 0.788         | 0.000    |

**Table S4.** AUC and significance of the ROC analysis for the prediction of an individual's status in urine.

|                                     | 3–7-year-old |          | 8–12-year-old |          |
|-------------------------------------|--------------|----------|---------------|----------|
|                                     | AUC          | <i>P</i> | AUC           | <i>P</i> |
| Dopamine (DA)                       | 0.503        | 0.967    | 0.518         | 0.768    |
| Epinephrine (E)                     | 0.491        | 0.918    | 0.362         | 0.025    |
| Norepinephrine (NE)                 | 0.583        | 0.322    | 0.623         | 0.045    |
| Metanephrine (MN)                   | 0.564        | 0.446    | 0.714         | 0.000    |
| Normetanephrine (NMN)               | 0.696        | 0.020    | 0.741         | 0.000    |
| Vanillylmandelic Acid (VMA)         | 0.627        | 0.132    | 0.446         | 0.379    |
| Homovanillic acid (HVA)             | 0.591        | 0.279    | 0.357         | 0.019    |
| 5-Hydroxyindoleacetic acid (5-HIAA) | 0.718        | 0.010    | 0.669         | 0.006    |
